# Supplementary material for: Isosorbide mononitrate promotes angiogenesis in embryonic development of zebrafish
Source: PubMed Central journal article supplement (PMC7380327; doi:10.1590/1678-4685-gmb-2019-0233), 2020-07-24
Supplement: 1415-4757-GMB-43-3-e20190233-suppl1.pdf [file 1415-4757-GMB-43-3-e20190233-suppl1.pdf]

**Supplementary Material to “Isosorbide mononitrate promotes angiogenesis in embryonic development of zebrafish”**

**Table S1** - Primers for genes involved in angiogenesis in zebrafish

| Primers | Sequences (5'-3')        |
|---------|--------------------------|
| vegf R  | CGAAACGTCACTATGGAGGTG    |
| vegf F  | GCAAGGCTCACAGTGGTTTT     |
| flt4 R  | ATGCCGGGGTATGGAGAC       |
| flt4 F  | CAGGCTTTAGTGAGGAGAGAGG   |
| kdrl F  | CTGGTGGAGAGGCTAGGAGA     |
| kdrl R  | TGATCGGGATGTAGTGCTTTC    |
| fli1a R | CAGCATCATAAGACGCATCG     |
| fli1a F | CCATCTCACACGCTGACCAGT    |
| pdgfr R | TTCCCCTCGAGAGACAGGA      |
| pdgfr F | GGCACACAGAAAAGGGAAAAG    |
| gapdh R | CATGTAATCAAGGTCAATGAATGG |
| gapdh F | CAGGCATAATGGTTAAAGTTGGTA |
