# Supplementary material for: Isosorbide mononitrate promotes angiogenesis in embryonic development of zebrafish
Source: PubMed Central journal article supplement (PMC7380327; doi:10.1590/1678-4685-gmb-2019-0233), 2020-07-24
Supplement: 1415-4757-GMB-43-3-e20190233-suppl2.pdf [file 1415-4757-GMB-43-3-e20190233-suppl2.pdf]

**Supplementary Material to “Isosorbide mononitrate promotes angiogenesis in embryonic development of zebrafish”**

**Table S2** - Primers for miRNAs involved in angiogenesis in HUVECs

| Primers   | Sequences (5' -3')                             |
|-----------|------------------------------------------------|
| miR-210F  | ACACTCCAGCTGGGCTGTGCGTGTGACAGC                 |
| miT-210R  | CTCAACTGGTGTGTCGTGGAGTCGGCAATTCAGTTGAGTCAGCCGC |
| miR-222F  | ACACTCCAGCTGGGAGCTACATCTGGCTGGCTACTG           |
| miR-222R  | CTCAACTGGTGTGTCGTGGAGTCGGCAATTCAGTTGAGGAGACCCA |
| miR-130aF | ACACTCCAGCTGGGCAGTGCAATGTTAAAA                 |
| miR-130aR | CTCAACTGGTGTGTCGTGGAGTCGGCAATTCAGTTGAGATGCCCTT |
| miR-221F  | ACACTCCAGCTGGGAGGGAGCTACATTGTCTGCT             |
| miR-221R  | CTCAACTGGTGTGTCGTGGAGTCGGCAATTCAGTTGAGAAACCCAG |
| miR-126F  | ACACTCCAGCTGGGAGGCGCTCGTACCGTGAGTAA            |
| miR-126R  | CTCAACTGGTGTGTCGTGGAGTCGGCAATTCAGTTGAGAGGACATT |
| U6 F      | GTGCTCGCTTCGGCAGCACAT                          |
| U6 R      | ATGGAACGCTTCACGAATTTG                          |
